# Supplementary material for: Enhanced shape memory performance of polyurethanes via the incorporation of organic or inorganic networks
Source: Royal Society of Chemistry journal article supplement (doi:10.1039/c4ra14277b), 2015-01-01
Supplement: c4ra14277b1.pdf [file c4ra14277b1.pdf]

## **Enhanced Shape Memory Performance of Polyurethanes via the Incorporation of Organic or Inorganic Networks**

Chien-Hsin Wu<sup>1</sup>, Shi-Min Shau<sup>2</sup>, Shin-Chih Liu<sup>2</sup>, Shenghong A. Dai<sup>2</sup>, Su-Chen Chen<sup>3</sup>,  
Rong-Ho Lee<sup>2\*</sup>, Chi-Fa Hsieh<sup>4</sup>, and Ru-Jong Jeng<sup>1\*</sup>

<sup>1</sup> Institute of Polymer Science and Engineering, National Taiwan University, Taipei  
106, Taiwan

<sup>2</sup> Department of Chemical Engineering, National Chung Hsing University, Taichung  
402, Taiwan

<sup>3</sup> Department of Energy and Materials Technology, Hsiuping University of Science  
and Technology, Taichung 412, Taiwan

<sup>4</sup> Chung-Shan Institute of Technology, Lungtan, Taoyuan 325, Taiwan

\*Corresponding authors. RHL, Tel.: +886-4-2285-4308; Fax: +886-4-2285-4734 ;  
RJJ, Tel.: +886-2-3366-5884; Fax: +886-2-3366-5237

E-mail: [rhl@dragon.nchu.edu.tw](mailto:rhl@dragon.nchu.edu.tw) (RHL) ; [rujong@ntu.edu.tw](mailto:rujong@ntu.edu.tw) (RJJ)

## Supporting Information

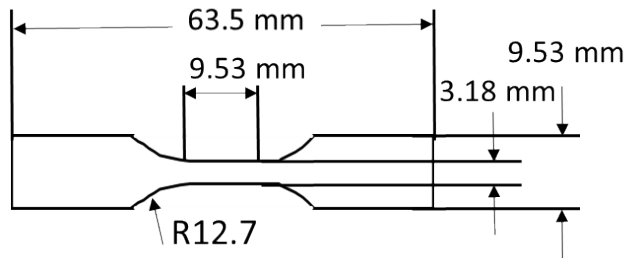

Fig S1. ASTM D638 specification for tensile strength measurements.

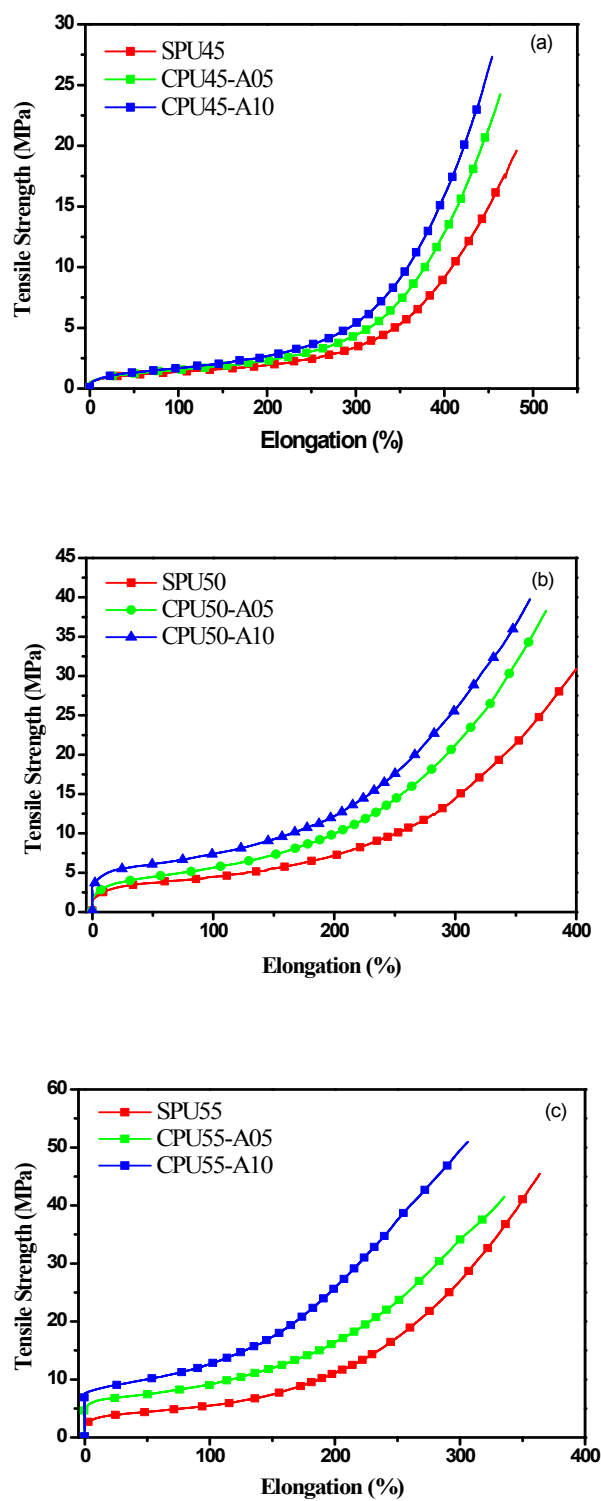

Figure S2. Tensile strengths of the CPU samples.

Shape memory test condition:

The shape memory test was employed to evaluate the shape fixity and shape recovery performances. In the beginning, the painted red PU samples were deformed and wound around a rod at a deformation temperature ( $T_{\text{def}} = 70\text{ }^{\circ}\text{C}$ ), and annealed for 15 s. Subsequently, the samples were cooled to a fixed temperature ( $T_{\text{fix}} = 10\text{ }^{\circ}\text{C}$ ) for 15 s. After that, the samples were heated to  $70\text{ }^{\circ}\text{C}$  again. The recovery of the deformed PU samples was observed as a function of time.
